1 **Asymmetric chromatin capture and nuclear envelopes separate chromosomes in**  
2 **fused cells during mitosis**

3

4 Bharath Sunchu <sup>1</sup>, Nicole Lee <sup>1,2</sup>, Roberto Carlos Segura<sup>1</sup>, Chantal Roubinet<sup>3</sup> & Clemens  
5 Cabernard <sup>1</sup>

6

7

8

9 <sup>1</sup> Department of Biology, University of Washington

10 Life Science Building

11 Seattle, Washington State, USA

12

13

14 Current address:

15 <sup>2</sup> Cancer Science Institute, National University of Singapore, Singapore

16 <sup>3</sup> MRC-Laboratory for Molecular Cell Biology, University College London, London, UK

17

18

19 \* Lead and corresponding author: [ccabern@uw.edu](mailto:ccabern@uw.edu)

20

21

22 **Abstract**

23

24 Hybrid cells derived through fertilization or somatic cell fusion recognize and separate  
25 chromosomes of different origin. The underlying mechanisms are unknown but could prevent  
26 aneuploidy and tumor formation. Here, we acutely induce fusion between *Drosophila* neural stem  
27 cells (neuroblasts; Nbs) and differentiating ganglion mother cells (GMCs) *in vivo* to define how  
28 epigenetically distinct chromatin is recognized and segregated. We find that Nb-GMC hybrid cells  
29 align both endogenous (neuroblast-origin) and ectopic (GMC-origin) chromosomes at the  
30 metaphase plate through centrosome derived dual-spindles. Mixing of endogenous and ectopic  
31 chromatin is prevented through an asymmetric, microtubule-dependent chromatin capture  
32 mechanism during interphase and physical boundaries imposed by nuclear envelopes. Although  
33 hybrid cells fail to accurately segregate ectopic chromatin, hybrid cells neither reduce the lifespan  
34 nor form visible tumors in host flies. We propose that Nb-GMC derived hybrid cells utilize  
35 asymmetric centrosome activity in interphase and nuclear envelopes to physically separate  
36 epigenetically distinct chromatin.

37

38

## 39 Introduction

40 Dividing cells equally distribute the replicated chromosomes between the two sibling cells through  
41 microtubule-dependent attachment and segregation mechanisms (Maiato et al., 2017; McIntosh,  
42 2016). Microtubules of bipolar spindles are connected to chromosomes via kinetochore proteins,  
43 which are localized on centromeric DNA (Thomas et al., 2017; Yu et al., 2019). Mitotic metazoan  
44 cells usually only form a single bipolar spindle, but certain insect species, arthropods or mouse  
45 zygotes form two distinct mitotic spindles (dual-spindles hereafter), which physically separate the  
46 maternal from the paternal chromatin in the first division after fertilization (Kawamura, 2001;  
47 Reichmann et al., 2018; Snook et al., 2011). Chromosome separation also occurs in hybrid cells,  
48 derived from somatic cell-cell fusion events (Heasley et al., 2017; Rieder et al., 1997). Dual-  
49 spindle dependent chromosome separation suggests the presence of specific chromosome  
50 recognition mechanisms, distinguishing between epigenetically distinct chromatin. The molecular  
51 nature of these recognition mechanisms is not known but could entail asymmetries in centromere  
52 binding proteins, kinetochore size or kinetochore composition (Akeru et al., 2019; Arco et al.,  
53 2018; Drpic et al., 2018; Ranjan et al., 2019).

54 Over a century ago, unregulated cell-cell fusion between different somatic cells has been  
55 proposed to initiate tumor formation (Aichel, 1911). Aichel's cell fusion model has the advantage  
56 that it can readily explain aneuploidy, a feature frequently observed at the early stages of tumor  
57 development (Ogle et al., 2005; Platt and Cascalho, 2019). Tetraploidy and supernumerary  
58 centrosomes – the natural products of cell fusion – predispose cells to aneuploidy through  
59 chromosome rearrangements (Fujiwara et al., 2005). Aichel's cell fusion model still remains to be  
60 experimentally validated, which requires a detailed characterization of chromosome dynamics in  
61 fused cells *in vivo*.

62 Here, we ask how hybrid cells derived through cell-cell fusion of molecularly distinguishable  
63 cell types accurately recognize, separate and segregate epigenetically distinct chromosomes. To  
64 this end, we acutely fused *Drosophila* neural stem cells (neuroblasts (NBs), hereafter) with  
65 differentiating ganglion mother cells (GMCs) in the intact larval fly brain to create hybrid cells  
66 containing both neuroblast and GMC chromosomes. Unperturbed *Drosophila* neuroblasts divide  
67 asymmetrically, self-renewing the neural stem cell while forming a differentiating GMC.  
68 Neuroblasts are twice the size of GMCs, express the transcription factor Deadpan (Dpn<sup>+</sup>) and  
69 divide asymmetrically with a rapid cell cycle. The smaller GMCs can also be identified based on  
70 Prospero (Pros<sup>+</sup>) expression and divide only once with a long cell cycle (Gallaud et al., 2017).

71 Neuroblasts are intrinsically polarized, consisting of an apically localized Par complex, which is  
72 connected to the Pins complex, composed of Partner of Inscuteable (Pins; LGN/AGS3 in  
73 vertebrates), Gai and Mushroom body defects (Mud; NuMA in vertebrates, Lin-5 in *C. elegans*)  
74 (Gallaud et al., 2017; Loyer and Januschke, 2020; Sunchu and Cabernard, 2020). The Pins  
75 complex regulates spindle orientation during mitosis and biased centrosome asymmetry in  
76 interphase, manifested in the establishment and maintenance of an apical interphase microtubule  
77 organizing center (MTOC). The active interphase MTOC retains the daughter-centriole containing  
78 centrosome close to the apical cell cortex and pre-establishes spindle orientation in the  
79 subsequent mitosis (Gallaud et al., 2020; Gambarotto et al., 2019; Januschke et al., 2013, 2011;  
80 Januschke and Gonzalez, 2010; Rebollo et al., 2007; Rusan and Peifer, 2007).

81 We found that hybrid cells derived from such Nb-GMC fusions independently align the  
82 endogenous (neuroblast-origin) and ectopic (GMC-origin) chromosomes at the metaphase plate.  
83 We propose that these hybrid cells utilize asymmetric centrosome activity in interphase to capture,  
84 and nuclear envelopes to physically separate, epigenetically distinct chromatin *in vivo*. These  
85 findings provide mechanistic insight into how metazoan cells recognize and isolate chromosomes  
86 of different origin.

87

## 88 **Results**

89

### 90 **Nb-GMC hybrid cells independently align Nb and GMC chromatin at the metaphase plate**

91 To quantitatively describe chromosome dynamics in hybrid cells we developed an acute cell-cell  
92 fusion method in intact larval fly brains. We used a 532nm pulsed laser to induce a small lesion  
93 at the Nb – GMC interface, causing the GMC chromatin to enter the neuroblast cytoplasm.  
94 Neuroblasts can be distinguished from GMCs based on their size, molecular markers and cell  
95 cycle length (Figure 1 – figure supplement 1A). Targeted mitotic neuroblasts often retained the  
96 GMC chromosomes, creating a large apical hybrid cell containing one Dpn<sup>+</sup> and one Pros<sup>+</sup>  
97 nucleus (Nb – GMC hybrid). Most Nb – GMC hybrid cells normally localized the contractile ring  
98 marker non-muscle Myosin to the cleavage furrow and completed cytokinesis (Figure 1 – figure  
99 supplement 1B-E). Acute cell fusion can also result in the expulsion of the GMC chromatin,  
100 forming GMC – GMC hybrids (see Supplementary Figure 3c in (Roubinet et al., 2017)). Here, we  
101 are focusing on Nb – GMC hybrids (hybrid cells, hereafter) only.

102 To better characterize the dynamics of neuroblast (endogenous) and GMC (ectopic)  
103 chromosomes during mitosis, we induced cell fusion at different cell cycle stages in wild type  
104 neuroblasts, expressing the canonical chromosome marker His2A::GFP. We hypothesized that  
105 hybrid cells derived from Nb-GMC fusions early in the cell cycle could (1) align only the neuroblast  
106 chromosomes at the metaphase plate, (2) congress a mix of neuroblast and GMC chromosomes  
107 or (3) separate and align the two chromosome pools at the metaphase plate (Figure 1A). We  
108 found that the endogenous and ectopic chromatin was separated and distinguishable when  
109 fusions were induced in early mitosis. Both the ectopic and endogenous chromatin aligned at the  
110 metaphase plate (Figure 1B; video 1&2). Nb-GMC fusions could be induced at all cell cycle stages  
111 but GMC chromosomes aligned at the metaphase plate more accurately in hybrid cells derived  
112 from interphase or early prophase fusions (Figure 1C, D). All fusions reported here were  
113 performed with non-mitotic GMCs. We conclude that hybrid cells derived from fusions between  
114 interphase Nbs and non-mitotic GMCs accurately align ectopic and endogenous chromatin at the  
115 metaphase plate.

116 We next asked whether GMC chromatin congresses independently of neuroblast chromatin.  
117 To this end, we measured the time between nuclear envelope breakdown (NEB) and  
118 chromosome alignment at the metaphase plate for Nb and ectopic GMC chromatin in hybrid cells  
119 derived from interphase and early prophase fusions (Figure 1E). In most hybrid cells, ectopic and  
120 endogenous chromatin was distinguishable based on differences in location and intensity (see

121 Figure 1B; video 1&2). In untargeted control neuroblasts (unfused), Nb chromosomes aligned at  
122 the metaphase plate within 6.5 minutes after NEB (SD = 1.55; n = 6), which is insignificantly faster  
123 than the neuroblast chromosomes of hybrid cells (t = 6.9 mins; SD = 2.84; n = 11). GMC  
124 chromosomes aligned within 7.63 mins (SD = 3.69; n = 11), statistically not significantly different  
125 from unperturbed wild type chromosomes (Figure 1E). In most Nb-GMC hybrids, the endogenous  
126 neuroblast and the ectopic GMC chromosomes aligned at the metaphase plate with no significant  
127 time difference. However, in a few cases, ectopic chromatin aligned before or after the neuroblast  
128 chromatin (Figure 1F). These results suggest that the neuroblast and GMC chromatin can move  
129 independently to the metaphase plate in hybrid cells.

130

### 131 **Ectopic spindles distinguish between Nb and GMC chromatin**

132 We next investigated the mechanisms underlying independent Nb/GMC chromosome alignment,  
133 considering the following possibilities: ectopic chromosomes could be aligned together with the  
134 endogenous chromosomes via a single bipolar spindle. Alternatively, hybrid cells could form  
135 multiple bipolar spindles, which attach to either the neuroblast's, GMC's, or chromosomes from  
136 both cell types (Figure 2A). Live cell imaging showed that hybrid cells derived from interphase  
137 Nb-GMC fusions contained double spindles in almost all cases, whereas the vast majority of cell  
138 fusions induced in metaphase only formed one mitotic spindle (Figure 2B, C & video 3). Most  
139 hybrid cells contained two mitotic spindles, which typically formed at the same time (Figure 2D,  
140 E). We quantified spindle alignment and positioning dynamics by measuring the angle and  
141 distance between the two spindles during metaphase (Figure 2F and methods). The two spindles  
142 were initially misaligned and separated but decreased their inter-spindle distance and angle  
143 during metaphase (Figure 2G-I). We conclude that Nb-GMC hybrid cells align neuroblast and  
144 GMC chromosomes separately at the metaphase plate through the formation of independent  
145 mitotic spindles.

146

### 147 **Ectopic spindles are nucleated from GMC centrosomes**

148 Mitotic spindles can be nucleated through the centrosome-dependent, chromatin or microtubule  
149 pathway but when centrosomes are present, the centrosome pathway prevails (Prosser and  
150 Pelletier, 2017). To elucidate the mechanisms underlying ectopic spindle formation, we induced  
151 Nb-GMC fusions in interphase wild type neuroblasts expressing live centriole (Asterless;  
152 Asl::GFP) and spindle (cherry::Jupiter) markers, and assayed centrosome dynamics and spindle  
153 formation throughout mitosis. Normal wild type neuroblasts usually contained two Asl::GFP

154 positive centrioles in mitosis, forming a single bipolar spindle. However, in Nb-GMC hybrids, we  
155 predominantly found four Asl::GFP positive centrioles, two of which were introduced from the  
156 GMC (Figure 2J,K). The GMC centrosomes nucleated an ectopic bipolar spindle that  
157 subsequently aligned with the main neuroblast spindle. Although multipolar spindle formation can  
158 be prevented through centrosome clustering (Quintyne et al., 2005), we often observed that GMC-  
159 derived and Nb-derived spindles were oriented in parallel to each other but remained separate.  
160 These data suggest that ectopic spindles are formed through the centrosome pathway, using  
161 centrioles originating from GMCs.

162

163 **Microtubule-dependent, asymmetric chromatin-centrosome attachments retain**  
164 **chromosomes close to the apical neuroblast cortex during interphase**

165 Our data suggest that Nb and GMC chromatin are being separated through an endogenous, Nb-  
166 derived and an ectopic, GMC-derived mitotic spindle. We next investigated how these spindles  
167 distinguish between Nb and GMC chromosomes. During mitosis, microtubules emanate from  
168 centrosomes and attach to sister chromatids via kinetochore proteins, localizing to the  
169 centromeric region (Fukagawa and Earnshaw, 2014). *Drosophila* male germline stem cells  
170 contain asymmetric levels of the centromere-specific H3 variant (Centromere identifier (Cid) in  
171 flies (Henikoff et al., 2000) (Ranjan et al., 2019), prompting us to investigate whether hybrid cell  
172 spindles differentiate between endogenous and ectopic chromosomes based on differing levels  
173 of Cid. We induced Nb-GMC fusions of wild type cells expressing Cid::EGFP (Ranjan et al., 2019)  
174 in interphase or early prophase and measured Cid intensity on both GMC and Nb chromatin.  
175 These measurements did not reveal a significant intensity difference between Nb and GMC Cid  
176 (Figure 3 – figure supplement 1A). However, we noticed that endogenous Cid::EGFP was  
177 localized in very close proximity to the apical centrosome in unperturbed interphase and prophase  
178 wild type neuroblasts (Figure 3A & video 4). Cid::EGFP remained associated with chromatin  
179 throughout the neuroblast cell cycle, excluding the possibility that early Cid clusters are not  
180 connected with chromatin (Figure 3 – figure supplement 1B & video 5).

181 Interphase wild type neuroblasts contain only one active apical microtubule organizing center  
182 (MTOC), which retains the daughter centriole-containing centrosome close to the apical  
183 neuroblast cortex. The mother-centriole-containing centrosome is inactive in interphase but  
184 matures from prophase onward, positioning itself on the basal cell cortex (Gallaud et al., 2020;  
185 Januschke et al., 2013, 2011; Januschke and Gonzalez, 2010). We measured the distance of  
186 individual Cid::EGFP clusters to the apical and basal centrosome in unperturbed wild type

187 neuroblasts and found that during interphase Cid was always in close proximity to the apical  
188 centrosome. After nuclear envelope breakdown (NEB), Cid moved progressively towards the  
189 metaphase plate. Once the basal centrosome appeared (0 mins), Cid was still closer to the apical  
190 than the basal centrosome and this distance asymmetry was also observed 6 minutes after the  
191 appearance of the basal centrosome (Figure 3B, C, H).

192 The proximity of Cid::EGFP clusters to the active interphase MTOC suggests a microtubule-  
193 dependent chromosome attachment mechanism. Indeed, wild type neuroblasts treated with the  
194 microtubule-depolymerizing drug colcemid showed a strong correlation between apical MTOC  
195 activity and Cid localization; as MTs depolymerized after colcemid addition, Cid progressively  
196 moved away from the apical cortex towards the cell center (Figure 3 – figure supplement 1C, D &  
197 video 6). To test whether MTOCs are connected to Cid clusters during interphase, we removed  
198 the centriolar protein Centrobin (Cnb; CNTROB in humans). Neuroblasts lacking Cnb fail to  
199 maintain an active apical interphase MTOC but regain normal MTOC activity during mitosis  
200 (Januschke et al., 2013). Neuroblasts expressing *cnb* RNAi lost apical Cid localization after the  
201 apical centrosome downregulated its MTOC activity. However, maturing centrosomes  
202 reconnected with Cid in prophase (Figure 3D-G & video 7). Cid's proximity to the apical MTOC  
203 ('apical' refers to the centrosome destined to move to the apical cortex) in *cnb* RNAi expressing  
204 neuroblasts was much more varied compared to wild type. At 6 minutes after centrosome  
205 maturation onset, Cid – apical MTOC distance was comparable to wild type, as were Cid – basal  
206 centrosome distance relationships (Figure 3I, J). This suggests that when centrosomes mature  
207 during mitosis and MTOC activity is restored, Cid – MTOC attachments can be reestablished  
208 during early mitosis in *cnb* RNAi expressing neuroblasts (Figure 3G). We conclude that in wild  
209 type Nbs, Cid-containing chromatin is already attached to the apical centrosome prior to entry into  
210 mitosis.

211

### 212 **Asymmetric centrosome-chromatin attachments contribute to the separation of** 213 **endogenous and ectopic chromosomes**

214 Based on these observations, we hypothesized that the separation between endogenous and  
215 ectopic chromosomes could be due to a pre-attachment mechanism, preventing mixing of Nb and  
216 GMC chromosomes. To test this hypothesis, we first analyzed Cid localization in relation to the  
217 endogenous and ectopic centrosomes in wild type hybrid cells. Similar to unperturbed wild type  
218 neuroblasts, endogenous Cid is also localized in close proximity to the endogenous apical  
219 centrosome in wild type hybrid cells (Figure 4A-C, G, H & video 8; 'apical' refers to the centrosome



220 destined to segregate into the large apical sibling cell). Ectopic Cid, however, appeared closer to  
221 ectopic centrosomes (Figure 4A-C, I & video 8; 0 mins refers to the appearance of the  
222 endogenous basal centrosome; '0' refers to the appearance of the ectopic centrosomes).  
223 We next attempted to randomize Cid – centrosome distance relationships by inducing fusions in  
224 *cnb* RNAi expressing neuroblasts, since loss of interphase MTOC activity released endogenous  
225 Cid from the apical centrosome (Figure 3D-J and Figure 3 - figure supplement 1C, D). In contrast  
226 to wild type hybrid cells, endogenous Cid is roughly equidistant to the endogenous and ectopic  
227 centrosomes in *cnb* RNAi expressing hybrid cells at 0 mins and '0' mins respectively (Figure 4D-  
228 F, J, K & video 9). However, ectopic Cid was still closer to the ectopic centrosomes than to the  
229 endogenous apical centrosome in *cnb* RNAi expressing hybrid cells (Figure 4D, F, L & video 9).  
230 In both wild type and *cnb* RNAi expressing hybrid cells, ectopic and basal centrosomes were  
231 about equidistant to endogenous Cid, but ectopic centrosomes were closer to ectopic Cid (Figure  
232 4 - figure supplement 1A-D). Taken together, we conclude that in hybrid cells the apical MTOC  
233 forms an asymmetric attachment to endogenous Cid-containing chromosomes prior to entry into  
234 mitosis.

235

### 236 **Nuclear envelopes separate ectopic and endogenous chromatin in hybrid cells**

237 We next asked whether early MTOC – Cid attachments are sufficient to prevent endogenous and  
238 ectopic chromosome separation and tracked endogenous and ectopic Cid::EGFP after induced  
239 cell fusion. In wild type hybrid cells, endogenous and ectopic CID clusters started to congress at  
240 the metaphase plate and became difficult to clearly separate 8.8 mins (SD = 5.63; n = 5; Figure  
241 4M) after NEB. However, 50% of *cnb* RNAi hybrid cells showed endogenous and ectopic Cid  
242 mixing prior to NEB (Figure 4D, N), although the time difference was not significantly different to  
243 wild type hybrid cells (Figure 4M).

244 Neuroblasts undergo semi-closed mitosis, mostly retaining a matrix composed of nuclear  
245 envelope proteins around the mitotic spindle (Katsani et al., 2008). We imaged hybrid cells with  
246 the nuclear envelope marker Klaroid, using the protein-trap line *koi::EGFP* (Buszczak et al.,  
247 2007). We confirmed that unperturbed wild type neuroblasts contain a nuclear envelope matrix  
248 surrounding the mitotic spindle during mitosis (Figure 4 – figure supplement 1E). Similarly, wild  
249 type hybrid cells contain two nuclear envelopes during mitosis (Figure 4O and Figure 4 – figure  
250 supplement 1F). Taken together, these data suggest that both asymmetric MTOC-Cid  
251 attachments in interphase and nuclear envelopes establish and maintain the physical separation  
252 between endogenous and ectopic chromosomes in hybrid cells. Loss of biased interphase MTOC

253 activity removes asymmetric MTOC-Cid attachments and allows for cross-connections between  
254 endogenous centrosomes and ectopic Cid in early mitosis (Figure 4P).

255

### 256 **Hybrid cells segregate endogenous and ectopic chromosomes independently**

257 We next investigated whether both bipolar spindles are functional in Nb-GMC hybrid cells.  
258 Erroneous or incomplete microtubule-kinetochore attachments trigger the spindle assembly  
259 checkpoint (SAC), preventing or delaying anaphase entry (Musacchio, 2015). Since the  
260 kinetochore-derived 'wait anaphase' signal is diffusible (Heasley et al., 2017), ectopic spindles  
261 should thus also obey the SAC in Nb-GMC hybrid cells. We tested whether hybrid cells contain  
262 functional microtubule-kinetochore attachments by measuring the time between finished  
263 chromosome alignment at the metaphase plate and chromosome separation in Nb-GMC hybrids  
264 expressing His2A::GFP and cherry::Jupiter (Figure 5A, B). Unperturbed control neuroblasts  
265 usually initiate anaphase onset within 2.63 minutes (SD=1.84; n=12) after chromosomes are  
266 aligned at the metaphase plate. In hybrid cells derived from interphase fusions, endogenous and  
267 ectopic chromatin entered anaphase 4.14 mins (SD= 2.23; n=14) and 5.12 minutes (SD= 1.85;  
268 n=13) after metaphase alignment. Only ectopic chromatin for prophase-induced hybrid cells  
269 showed a significantly delayed anaphase onset (Average: 10.25 mins; SD= 4.12; n=6) (Figure  
270 5C). Ectopic chromatin never separated before endogenous chromosomes but entered anaphase  
271 with a few minutes' delay (Figure 5D). We conclude that in Nb-GMC hybrids, endogenous and  
272 ectopic chromosomes establish correct MT-kinetochore attachments, thereby fulfilling the spindle  
273 assembly checkpoint necessary to enter anaphase. However, given the delays in ectopic  
274 chromosome separation, we further conclude that ectopic spindles can initiate chromatid  
275 separation independently from the endogenous neuroblast spindle.

276

### 277 **Hybrid cells are insufficient to induce tumors in wild type host flies**

278 Finally, we assessed the accuracy of chromosome segregation in wild type hybrid cells. Using  
279 the canonical chromosome marker His2A::GFP we detected chromosome missegregation -  
280 ranging from lagging chromosomes to chromosome bridges - in all wild type hybrid cells (Figure  
281 5E,F & video 10). Chromosome segregation defects can result in aneuploidy and micronuclei  
282 formation (Molina et al., 2020). We found a small percentage of hybrid cells containing  
283 micronuclei, but more frequently discovered heterokaryons (hybrid cells containing two nuclei of  
284 different origins). In most cases, hybrid cells fused both nuclei into one, forming synkaryons  
285 (Figure 5G).

286           Aneuploidy has been proposed to be a hallmark of cancer (Molina et al., 2020) but appears  
287 to be context dependent (Ben-David and Amon, 2020). To test whether neuroblast – GMC derived  
288 hybrid cells are sufficient to induce tumor formation, we grafted His2A::GFP expressing larval fly  
289 brains after successful induction of cell fusion into the abdomen of wild type adult hosts (Rossi  
290 and Gonzalez, 2015) and monitored the host flies for tumor formation and life span changes. As  
291 previously reported (Caussinus and Gonzalez, 2005), brat RNAi expressing brains formed visible  
292 tumors in host flies by day 30 and caused a reduction in lifespan of the host. However, larval  
293 brains without attempted fusions (wild type transplants), with attempted but unsuccessful fusions  
294 (controlling for the effect of laser ablation), or with successful fusions, showed neither tumor  
295 growth by day 30 (or after), nor a reduction in lifespan (Figure 6A, B, C). We conclude that  
296 chromosome segregation is defective in Nb-GMC hybrid cells but insufficient to form visible  
297 tumors in otherwise normal and unperturbed larval fly brains.

298

## 299 Discussion

300

301 Cell – cell fusion can occur under normal physiological conditions and has been implicated in  
302 malignancy (Platt and Cascalho, 2019) but how hybrid cells recognize and separate endogenous  
303 and ectopic chromosomes during mitosis is not known. Here, we acutely induce cell-cell fusions  
304 *in vivo* between Dpn<sup>+</sup> stem cells and differentiating Pros<sup>+</sup> GMCs in the developing larval fly brain.  
305 We showed that Nb-GMC derived hybrid cells physically separate endogenous neuroblast  
306 chromosomes from the introduced ectopic GMC chromosomes and align them independently at  
307 the metaphase plate. Chromosome separation is achieved through the formation of two distinct  
308 mitotic spindles, which are most likely formed through the canonical centrosome pathway. These  
309 dual spindles co-align during metaphase, thereby congressing the two chromosome clusters at  
310 the metaphase plate. Endogenous and ectopic chromosomes independently segregate during  
311 anaphase, manifested in delayed segregation onset of ectopic chromatin. Although chromosome  
312 missegregation is frequent in hybrid cells, potentially leading to aneuploidy, we failed to detect  
313 malignant tumor formation when hybrid cell – containing larval brains were grafted into wild type  
314 host flies.

315 We propose that endogenous and ectopic chromosome separation is achieved through an early  
316 microtubule-dependent chromosome capture or attachment mechanism that retains endogenous  
317 chromosomes in close proximity to the apical neuroblast cortex during interphase. Interphase  
318 neuroblasts contain one active MTOC that remains stably anchored close to the apical cell cortex  
319 (Rebollo et al., 2007; Rusan and Peifer, 2007). In wild type neuroblasts, chromatin associated Cid  
320 is localized in close proximity to the apical MTOC, but Cid's apical localization is lost upon  
321 microtubule-depolymerization or removal of interphase MTOC activity (*cnb* RNAi). Thus,  
322 unperturbed wild type neuroblast either retained, or establish microtubule-chromatin connections  
323 during interphase. In contrast to yeast, where chromosomes make dynamic attachments to  
324 microtubules in G1 (Dorn et al., 2005), this is not the case in other metazoan cells (Maiato et al.,  
325 2017). The functional significance of these interphase microtubule-chromatin attachments in  
326 neuroblasts are not known but are similar to *Drosophila* male germline stem cells (GSCs), where  
327 a single active centrosome connects to chromosomes in prophase, a potential mechanism for  
328 biased chromatid segregation (Ranjan et al., 2019).

329 The geometric separation of endogenous and ectopic chromatin in hybrid cells is further  
330 supported by the nuclear envelope, imposing a physical boundary that prevents random  
331 chromosome mixing prior to chromosome congression (Figure 6D). In pre-mitotic neuroblasts,

332 chromatin can be connected with centrosomes through the Linc complex (Lee and Burke, 2018),  
333 potentially implicating the SUN domain protein Klaroid (Kracklauer et al., 2007) and the KASH-  
334 domain protein Klarsicht (Lee and Burke, 2018; Razafsky and Hodzic, 2009) in asymmetric  
335 chromatin clustering and the prevention of chromatin mixing during interphase.

336 The chromatin separation mechanisms described here could be applicable to chromosome  
337 separation occurring in the first cleavage after fertilization in insects, arthropods and vertebrates  
338 (Kawamura, 2001; Reichmann et al., 2018; Snook et al., 2011). Similarly, biased chromatid and  
339 chromosome segregation has been observed in stem cells (Ranjan et al., 2019; Yadlapalli and  
340 Yamashita, 2013) and during meiosis, respectively (Akeru et al., 2017). Since centromeres have  
341 also been found to be confined to specific nuclear locations in many organisms (Muller et al.,  
342 2019; Weierich et al., 2003), it will be interesting to see whether microtubule-dependent chromatin  
343 attachment provides an alternative mechanism for biased sister chromatid segregation or other  
344 important cellular functions.

345

346

347

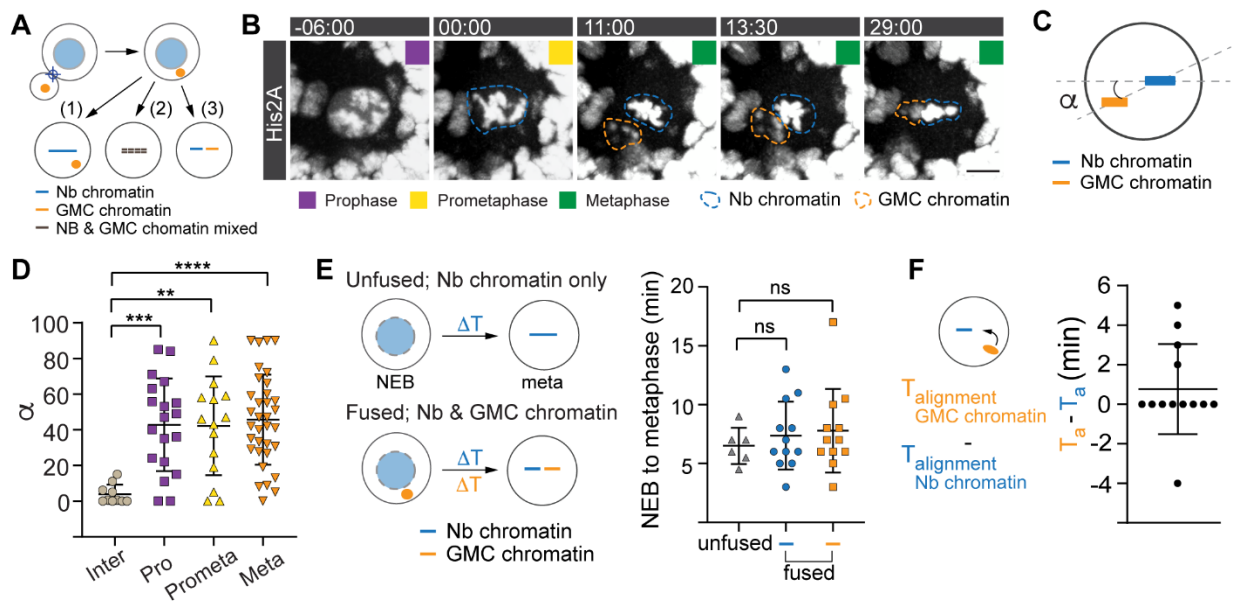

348

349

350

351

352 **Figure 1: Nb-GMC hybrid cells align Nb and GMC chromatin independently at the**  
 353 **metaphase plate.**

354 **(A)** Potential outcomes of Nb-GMC fusions: Nb – GMC derived hybrid cells could (1) only align  
 355 neuroblast chromosomes, (2) congress a mix of endogenous and ectopic chromosomes or (3)  
 356 separately align Nb and GMC chromosomes at the metaphase plate. **(B)** Representative image  
 357 sequence of a dividing third instar larval Nb-GMC hybrid cell obtained from an interphase fusion,  
 358 expressing the histone marker His2A::GFP (dashed blue circle; endogenous chromatin, dashed  
 359 orange circle; ectopic chromatin). **(C)** Alignment of endogenous and ectopic chromatin in hybrid  
 360 cells derived from interphase (inter), prophase (pro), prometaphase (prometa) or metaphase  
 361 (meta) fusions were quantified with angle measurements in metaphase and plotted in **(D)**. **(E)**  
 362 Chromosome alignment time for endogenous (blue circles) and ectopic chromosomes (orange  
 363 squares) compared to unfused control neuroblasts (grey triangles). **(F)** Scatter plot showing the  
 364 time difference ( $T_a$ ; time of alignment) between endogenous and ectopic chromatin. Colored  
 365 boxes represent corresponding cell cycle stages. One-way ANOVA was used for **(D)** and **(E)**.  
 366 Error bars correspond to standard deviation (SD). \*  $p < 0.05$ , \*\*  $p < 0.01$ , \*\*\*\*  $p < 0.0001$ . For this and  
 367 subsequent figures, exact p values and complete statistical information can be found in the  
 368 Extended data table 1. Time in mins:secs. Scale bar is 5  $\mu\text{m}$ .

369



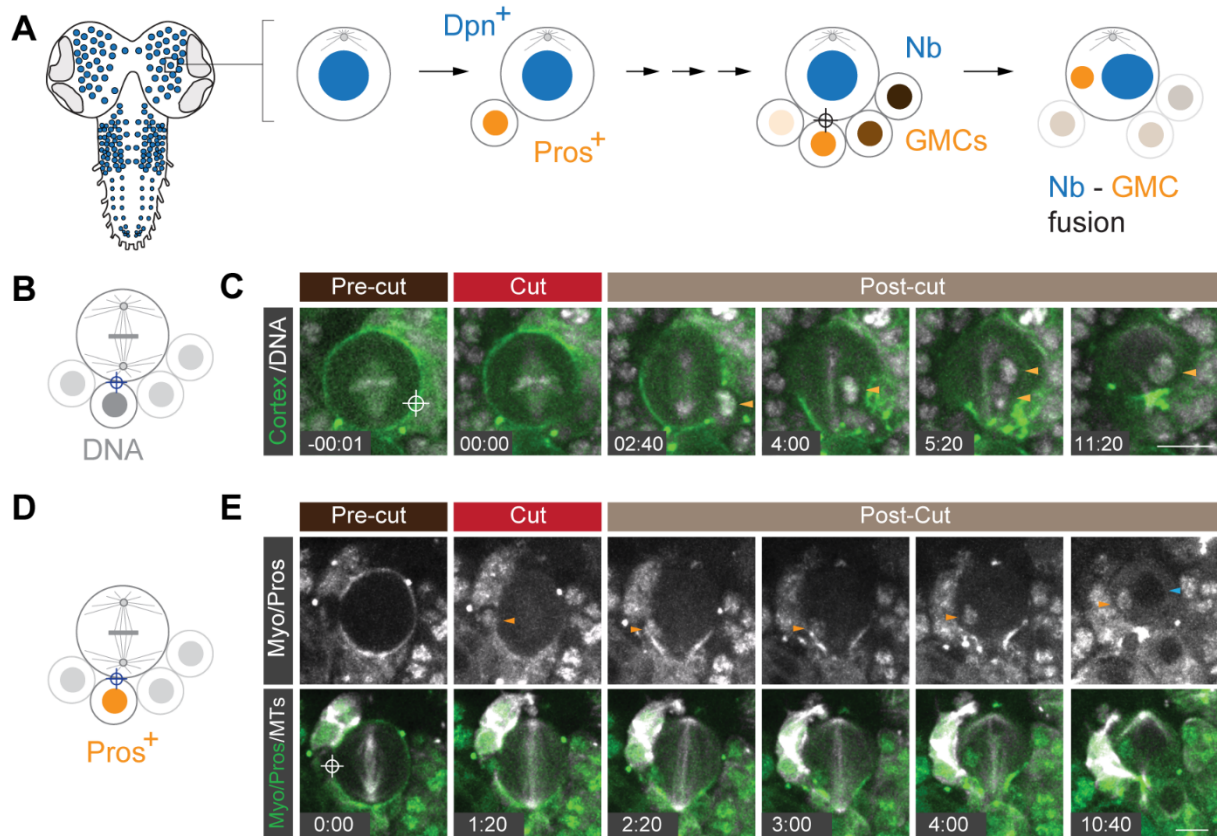

370

371

372 **Figure 1 – figure supplement 1: Acute induced Nb – GMC fusion in *Drosophila* larval**

373 **brains.**

374 **(A)** Schematic representation of a third instar *Drosophila* larval brain and neural stem cell division

375 mode. Neural stem cells (neuroblasts (Nbs); blue circles) divide asymmetrically, generating a

376 Prospero-positive, differentiating ganglion mother cell (GMC; Pros<sup>+</sup>) while self-renewing the Dpn<sup>+</sup>

377 neuroblast. GMCs cluster around Nbs and can be identified based on size and Prospero

378 expression. Acute Nb – GMC fusion can result in hybrid cells containing two molecularly distinct

379 nuclei. **(B)** Experimental outline and **(C)** representative example of a metaphase wild type

380 neuroblast, expressing the cell cortex marker Sqh::EGFP (green), the mitotic spindle marker

381 cherry::Jupiter (white) and the chromatin marker His2A::RFP (white). The site targeted by the

382 ablation laser is highlighted with the white crosshair. The orange arrowhead labels a GMC nucleus

383 moving into the Nb. This hybrid cell successfully completes cytokinesis. **(D)** Schematic and **(E)**

384 representative example of a wild type early anaphase neuroblast expressing Sqh::EGFP (white;

385 top, green; bottom), cherry::Jupiter (white) and Pros::EGFP (white). The orange arrowhead

386 highlights a Pros<sup>+</sup> GMC nucleus moving into the neuroblast. Cytokinesis completes, creating a

387 hybrid cell containing a Pros<sup>+</sup> and Pros<sup>-</sup> nucleus. Time in min:sec; scale bar: 10μm.

388

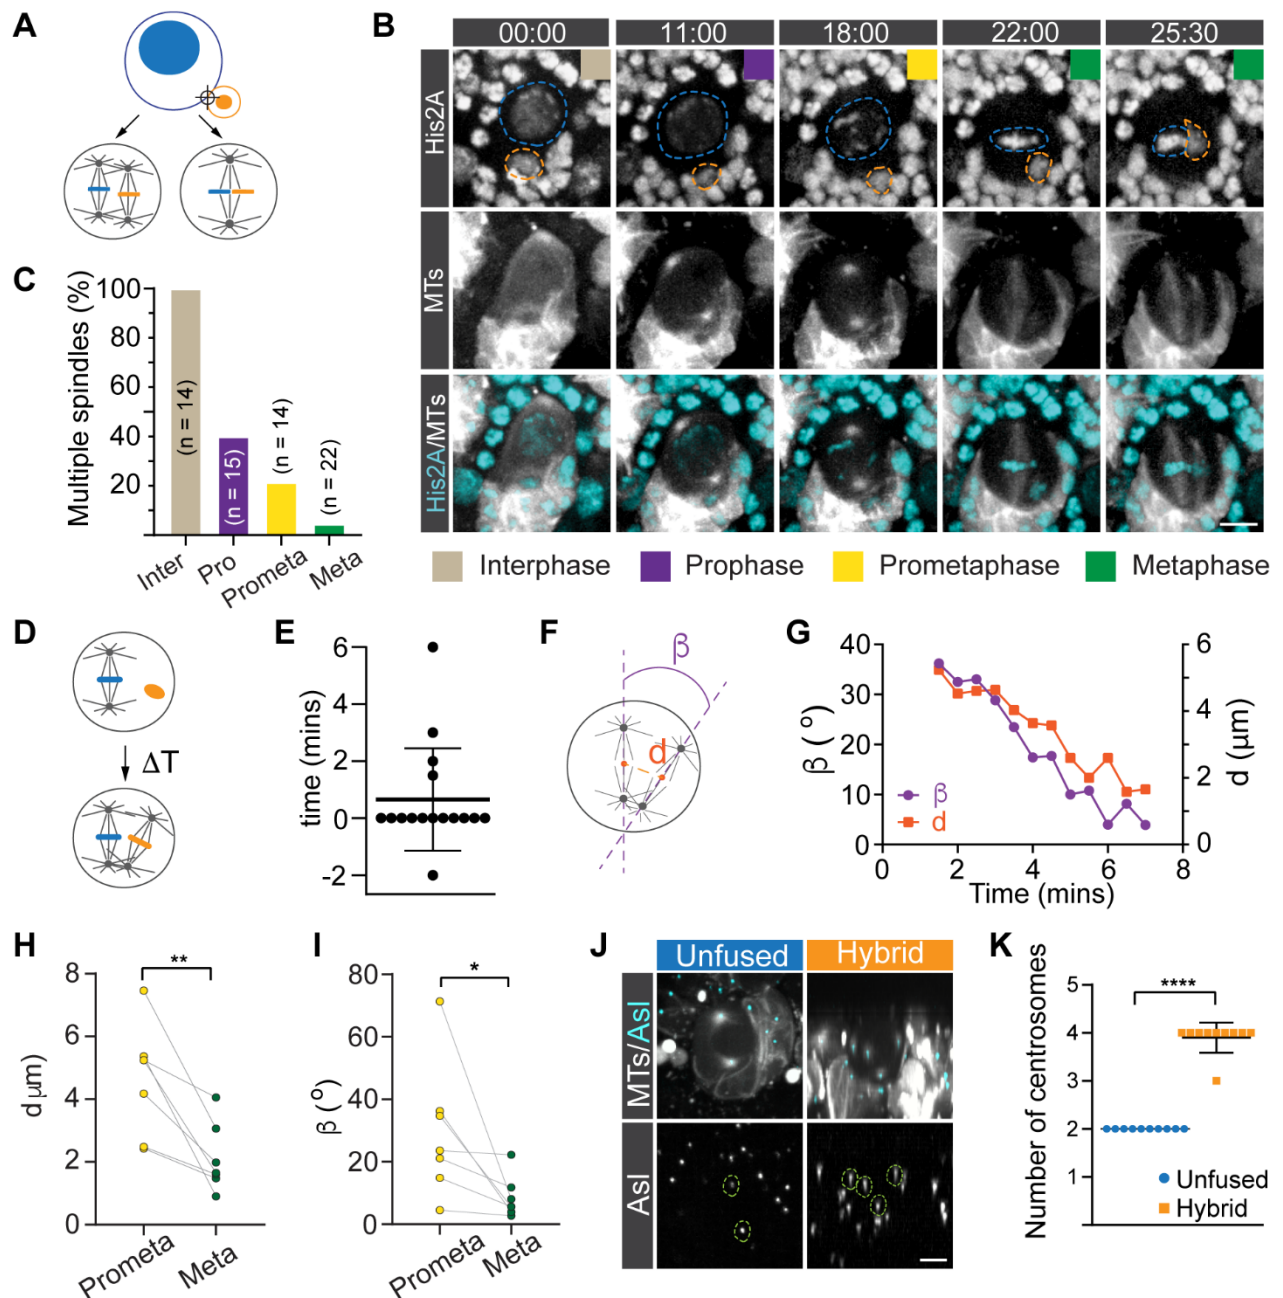

389

390 **Figure 2: Dual spindles align endogenous and ectopic spindles separately at the**  
 391 **metaphase plate.**

392 **(A)** Hypothetical outcomes of spindle organization after Nb-GMC fusions: hybrid cells could align  
 393 neuroblast and GMC chromosomes either through a single or dual-spindle mechanism. **(B)**  
 394 Representative third instar larval Nb-GMC hybrid cell, expressing the histone marker His2A::GFP  
 395 (white in top row; cyan in merged channel below) and the MT marker cherry::Jupiter (white in  
 396 middle and bottom row). 00:00 refers to nuclear envelope breakdown (NEB). **(C)** Quantification  
 397 of hybrid cells containing dual- or multiple spindles for hybrid cells derived from interphase (inter),  
 398 prophase (pro), prometaphase (prometa) or metaphase (meta) fusions. **(D)** The time difference  
 399 between endogenous and ectopic spindle formation was measured in hybrid cells and plotted in  
 400 **(E)**. **(F)** Spindle angle and inter-spindle distances were measured during mitosis. A representative  
 401 example is shown in **(G)**. Quantification of inter-spindle **(H)** distances and **(I)** angles at  
 402 prometaphase and metaphase. **(J)** A representative third instar larval Nb-GMC hybrid, expressing



403 the centriole marker Asl::GFP (cyan; top row. White; bottom row) and the spindle marker  
404 cherry::Jupiter (MTs; white in top row). Centrosomes were highlighted with green dashed circles.  
405 **(K)** Comparison of centrosome number between unfused wild type and hybrid cells.  
406 Colored boxes represent corresponding cell cycle stages. Error bars correspond to SDs. Figures  
407 (H) and (I); two-sided paired t-test, figures (K); two-sided unpaired t-test. \*  $p < 0.05$ , \*\* $p < 0.01$ , \*\*\*\*  
408  $p < 0.000$ . Time in mins:secs. Scale bar is 5  $\mu\text{m}$ .  
409

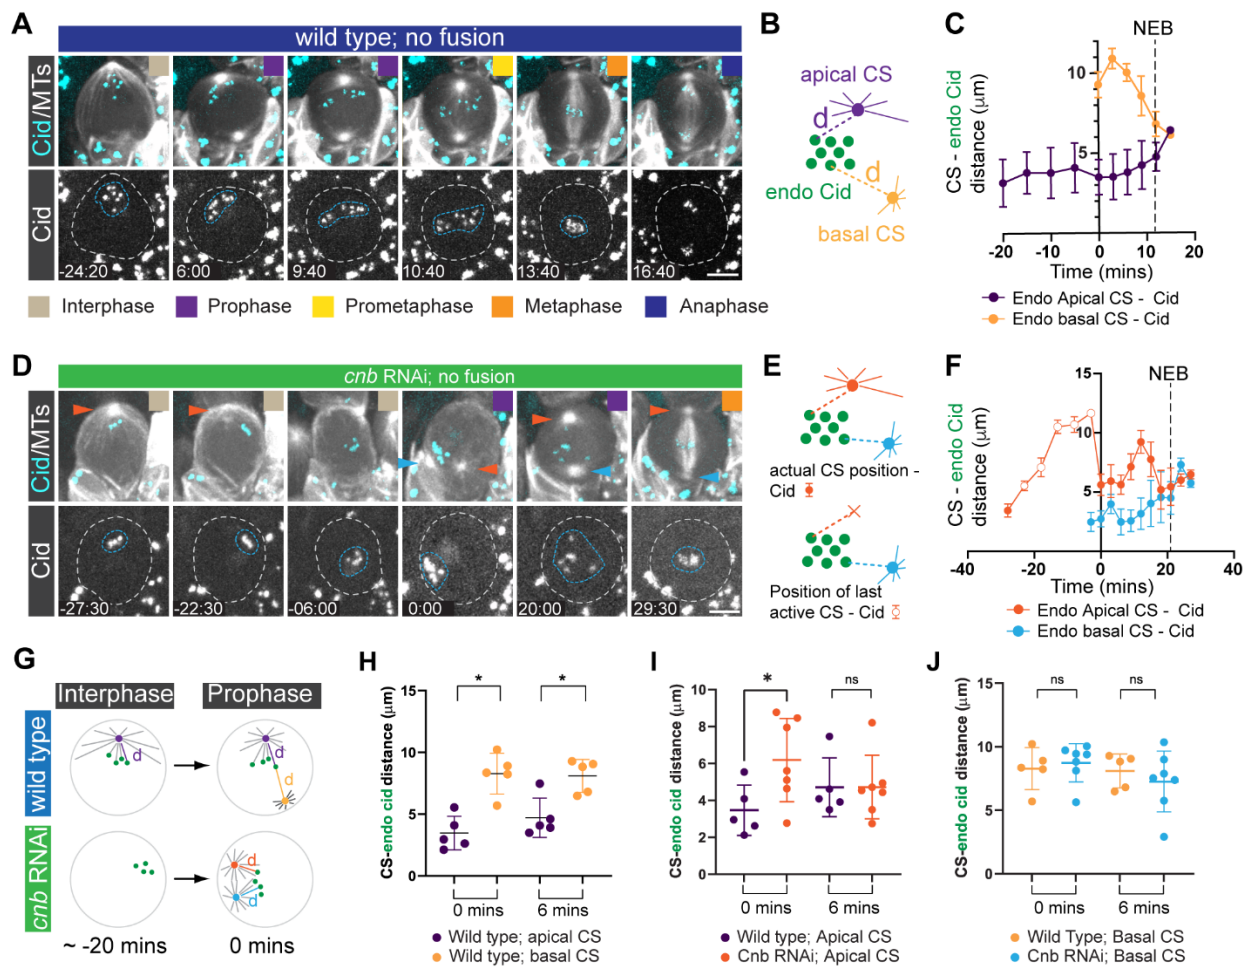

410

411

412 **Figure 3: Biased MTOC activity retains Cid in the apical neuroblast hemisphere during**  
 413 **interphase and early mitosis**

414 **(A)** Representative third instar larval neuroblast expressing the centromere specific Histone-3  
 415 variant marker, Cid::EGFP (cyan; top, white; bottom) and the microtubule marker cherry::Jupiter  
 416 (white; top). Colored boxes represent corresponding cell cycle stages. **(B)** The distance (purple  
 417 and yellow dashed lines) between the apical (purple) and basal (yellow) centrosome, and  
 418 individual Cid clusters (green circles) were measured throughout the cell cycle and plotted in **(C)**.  
 419 **(D)** Representative third instar larval neuroblast expressing *cnb* RNAi, cherry::Jupiter (white; top)  
 420 and Cid::EGFP (cyan; top, white; bottom row). Red arrowheads highlight the apical MTOC. Blue  
 421 arrowheads highlight the maturing basal MTOC. The blue dashed circle highlights Cid clusters.  
 422 The cell outline is indicated with the white dashed. ‘Apical’ centrosome refers to the centrosome  
 423 destined to be positioned on the apical cortex, whereas ‘basal’ centrosome will be inherited by  
 424 the basal GMC. **(E)** CS – Cid distance measurements were performed in *cnb* RNAi expressing  
 425 Nbs. Once the apical CS disappeared in interphase, the last detectable position was used as a  
 426 reference point (orange cross; open circles). **(F)** CS – Cid measurements for *cnb* RNAi expressing  
 427 Nbs. Closed arrows refer to actual CS – Cid measurements. Open circles denote Cid – previous  
 428 active CS measurements. **(G)** Wild type neuroblasts maintain apical CS – Cid attachments in

429 prophase, due to asymmetric MTOC activity and microtubule-dependent interphase centrosome  
430 – Cid attachments. *cnb* RNAi expressing neuroblasts lose MTOC activity in interphase,  
431 randomizing the position of Cid clusters. When centrosomes mature again in prophase, both  
432 centrosomes simultaneously attach to Cid clusters. **(H)** Centrosome – Cid distance of an  
433 unperturbed wild type neuroblast at the time of basal centrosome maturation (0 mins) and 6 mins  
434 thereafter. **(I, J)** Cid – centrosome distance measurement in *cnb* RNAi expressing neuroblasts.  
435 Error bars correspond to SDs. Figure (H, I, J); two-sided paired t-test. ns; no significance. \*  
436  $p < 0.05$ . Time in mins:secs. Scale bar is 5  $\mu\text{m}$ .  
437

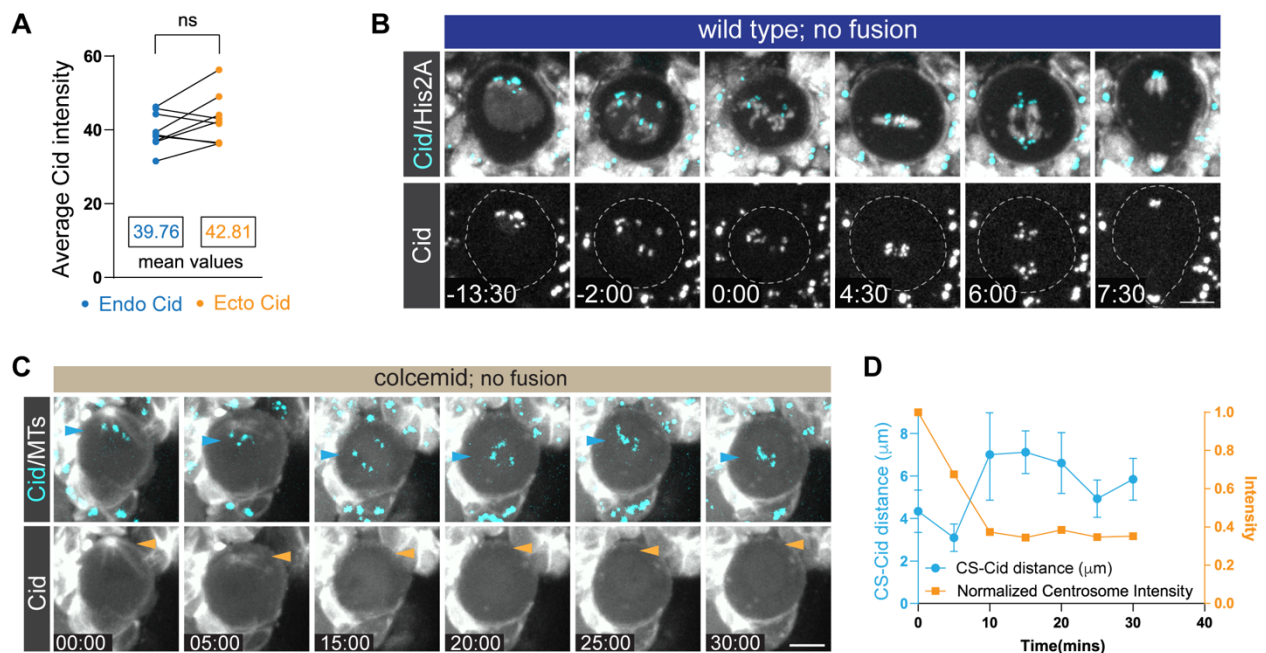

438

439

440 **Figure 3 - figure supplement 1: Microtubule-dependent, asymmetric chromatin-**  
 441 **centrosome attachments retain chromosomes close to the apical neuroblast cortex**  
 442 **during interphase.**

443 **(A)** CID intensity measurements of endogenous and ectopic CID in Nb-GMC hybrid cells (p-value,  
 444 0.1294). **(B)** Representative wild type neuroblast expressing the canonical histone marker  
 445 His2A::GFP (white) and Cid::EGFP (cyan; top, white; below). The white dashed line highlights the  
 446 cell outline. **(C)** Representative example of a wild type neuroblast expressing Cid::EGFP (cyan)  
 447 and the microtubule marker cherry::Jupiter treated with colcemid. Blue and yellow arrowheads  
 448 highlight the position of Cid clusters and the disappearing apical MTOC, respectively. **(D)** MTOC  
 449 intensity and Cid location measurements for the cell shown in (C). Time in mins:secs. Scale bar  
 450 is 5  $\mu\text{m}$ .

451

452

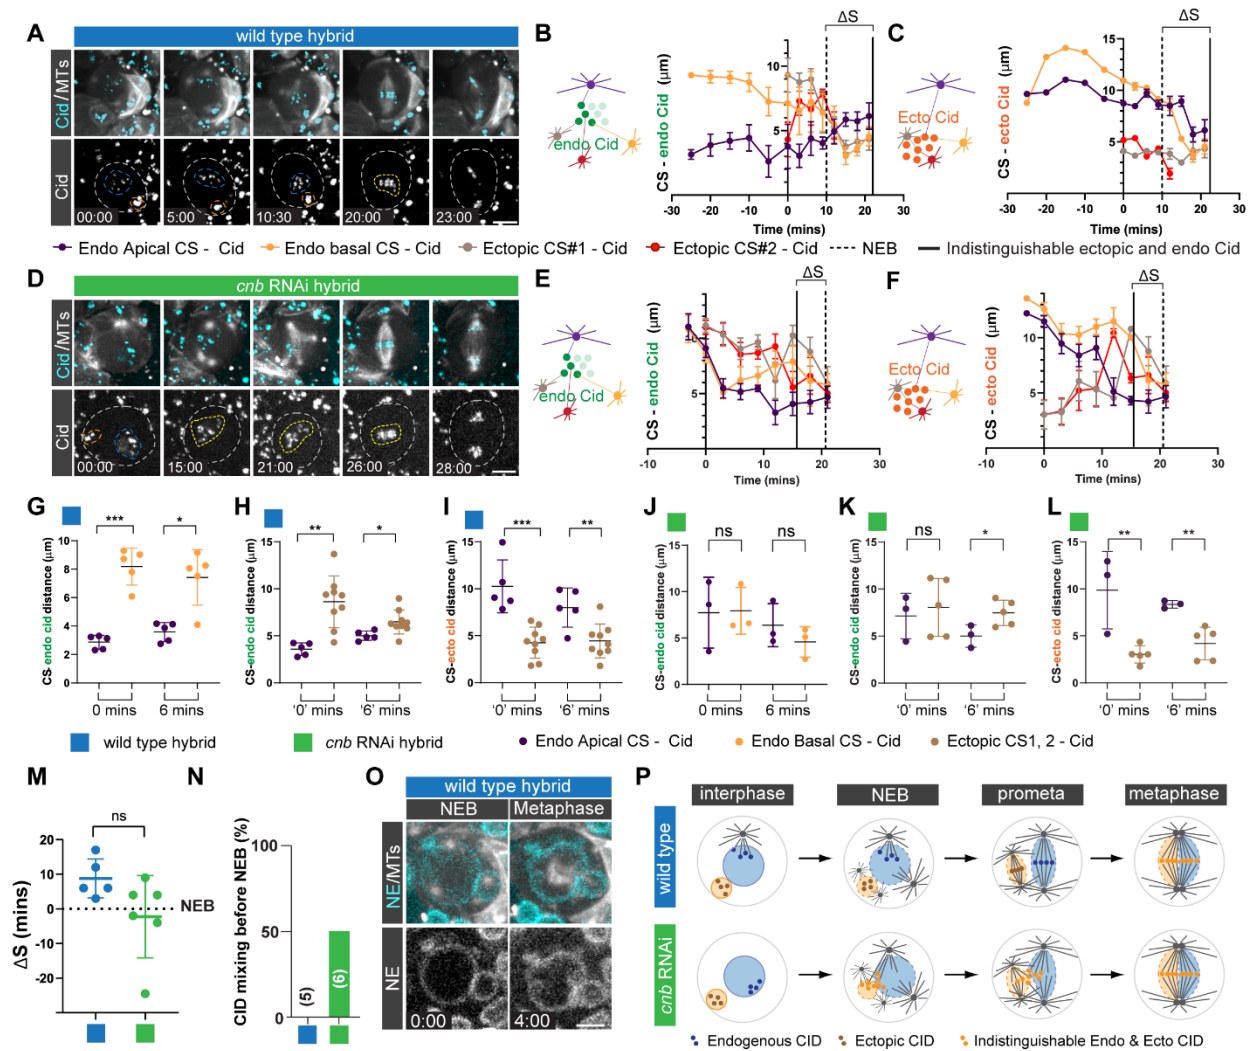

453

454

455 **Figure 4: Asymmetric microtubule dependent centrosome-chromatin attachments**

456 **contribute to the separation of endogenous and ectopic chromosomes.**

457 Representative third instar larval (A) wild type or (D) *cnb* RNAi expressing Nb-GMC hybrid cell,

458 expressing Cid::EGFP (top row; cyan, bottom row; white) and the microtubule marker

459 cherry::Jupiter (white; top row). Neuroblast-derived and GMC-derived Cid clusters are outlined

460 with a blue and orange dashed line, respectively. The white dashed line labels the cell outline.

461 Indistinguishable GMC and Nb Cid clusters are highlighted with yellow dashed circles. The

462 distance of (B) endogenous or (C) ectopic Cid from the wild type hybrid cell shown in (A) in relation

463 to GMC and Nb centrosomes (CS) plotted over time. (E) Endogenous or (F) ectopic Cid –

464 centrosome distance measurements of the *cnb* RNAi expressing hybrid cell shown in (D). The

465 vertical solid line indicates the time point when endogenous and ectopic Cid can no longer be

466 distinguished. Vertical dashed line indicates nuclear envelope breakdown. For (B), (C), (E), (F):

467  $\Delta S$  refers to the time difference between NEB and when ectopic and endogenous CID becomes

468 indistinguishable. Measurements of endogenous Cid – apical (purple) or basal (yellow)

469 endogenous centrosomes were plotted when (G) the endogenous basal centrosome matured (0

470 mins) and 6 minutes thereafter (6mins) or (H) the ectopic centrosomes matured ('0' mins) and 6

471 minutes thereafter. Corresponding measurements of *cnb* RNAi expressing hybrid cells are shown  
472 in **(J)** and **(K)**. Distance of ectopic Cid in relation to endogenous and ectopic centrosomes shown  
473 for **(I)** wild type or **(L)** *cnb* RNAi expressing hybrid cells. **(M)** Time interval between NEB and  
474 mixing of endogenous and ectopic Cid for wild type (blue circles) and *cnb* RNAi expressing (green  
475 circles) hybrid cells. **(N)** Bar graph showing percentage of hybrid cells in which the endogenous  
476 and ectopic CID mixed prior to NEB. **(O)** A third instar wild type hybrid cell expressing the nuclear  
477 envelope (NE) marker, *koi::GFP* (cyan; top row, white; bottom row) and *cherry::Jupiter*. **(P)**  
478 Schematic summary: separation of endogenous and ectopic chromosomes involves microtubule-  
479 dependent asymmetric chromatin-centrosome attachments and physical separation through  
480 nuclear envelopes. *cnb* RNAi expressing neuroblasts release endogenous Cid during interphase,  
481 partially randomizing re-attachment in the subsequent mitosis, which causes premature mixing of  
482 endogenous and ectopic Cid. Colored boxes refer to the indicated cell cycle stages. Error bars  
483 correspond to SDs. Figure (G); two-sided paired t-test and Figures (H-L); two-sided unpaired t-  
484 test. ns; no significance. \*  $p < 0.05$ , \*\*  $p < 0.01$ , \*\*\*  $p < 0.0001$ , \*\*\*\*  $p < 0.0001$ . Time in mins:secs. Scale  
485 bar is 5  $\mu\text{m}$ .

486

487



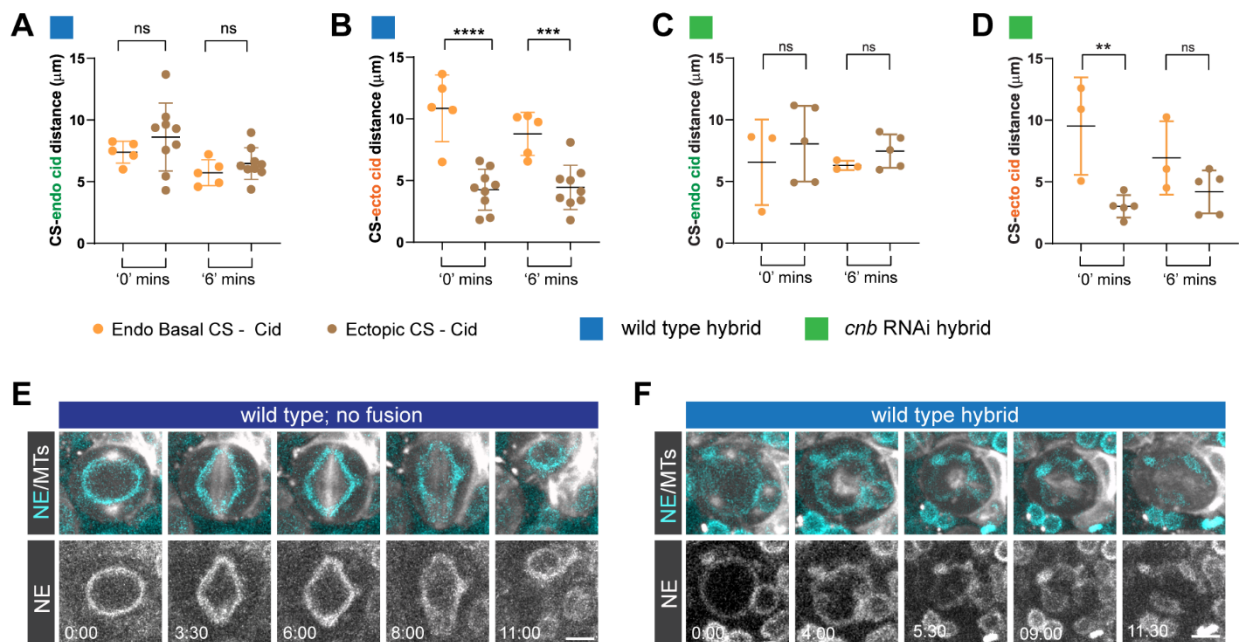

488

489

490 **Figure 4 – figure supplement 1: Asymmetric MTOCs and nuclear envelopes separate**

491 **endogenous and ectopic chromatin in Nb – GMC hybrid cells.**

492 **(A)** Averaged distance of basal centrosomes to *endogenous* Cid in wild type or **(C)** *cnb* RNAi

493 expressing neuroblasts. **(B)** Averaged distance of basal centrosomes to *ectopic* Cid in wild type

494 or **(D)** *cnb* RNAi expressing neuroblasts. Measurements are plotted for '0' mins (ectopic

495 centrosome maturation in wild type and *cnb* RNAi expressing hybrids) and 6 mins thereafter ('6').

496 Representative image sequence of a wild type **(E)** unfused neuroblasts or **(F)** hybrid cell,

497 expressing the nuclear envelope (NE) marker *koi::GFP* (cyan; top, white; bottom) and the

498 microtubule marker *cherry::Jupiter* (white; top). Error bars correspond to SDs. Figure (A-D) two-

499 sided unpaired t-test. ns; no significance. \*\*  $p < 0.01$ , \*\*\*  $p < 0.001$ , \*\*\*\*  $p < 0.0001$ . Time in

500 mins:secs. Scale bar is 5  $\mu\text{m}$ .

501

502

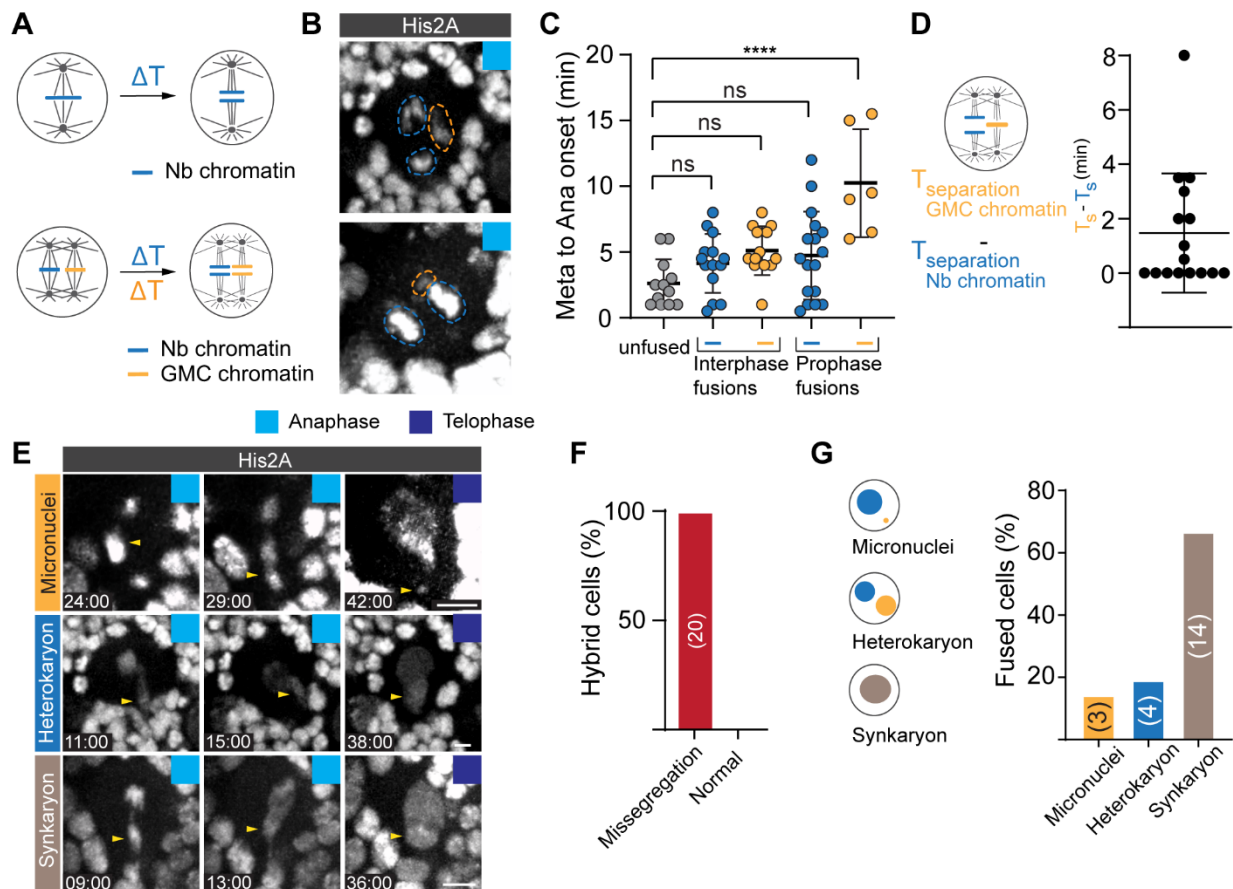

503

504

505 **Figure 5: Ectopic chromosomes in hybrid cells segregate independently but erroneously.**

506 **(A)** The time between chromosome alignment (metaphase) and separation (anaphase onset) was  
507 measured for endogenous and ectopic chromosomes in wild type hybrid cells and plotted in (C).

508 **(B)** Representative examples of delayed (top row) and simultaneous (bottom row) segregation of  
509 endogenous (blue dashed circle) and ectopic (orange dashed circle) chromosomes in wild type  
510 hybrid cells expressing the chromatin marker His2A::GFP. **(C)** Quantification of metaphase to

511 anaphase onset in control Nbs, compared to interphase and prophase Nb-GMC hybrids. **(D)**  
512 Average time difference between Nb and GMC chromatin anaphase onset in Nb-GMC hybrid

513 cells. **(E)** Representative third instar larval Nb-GMC hybrids expressing histone marker  
514 His2A::GFP showing missegregating chromatids (yellow arrowheads) during anaphase, resulting  
515 in micronuclei (top row), heterokaryon (middle row) or synkaryon (bottom row) formation. Time

516 stamps are in relation to NEB (=0:00). **(F)** Bar graph showing percentage of Nb-GMC hybrid cells  
517 with missegregating chromatids. **(G)** Bar graph quantifying the percentage of fused cells with

518 micronuclei, heterokaryons or synkaryons.  $\Delta T$ ; time difference. Error bars correspond to SDs.  
519 One way ANOVA test was used in (C). ns; no significance. \*\*\*\* p<0.0001. Time in mins:secs.

520 Scale bar is 5  $\mu$ m.

521



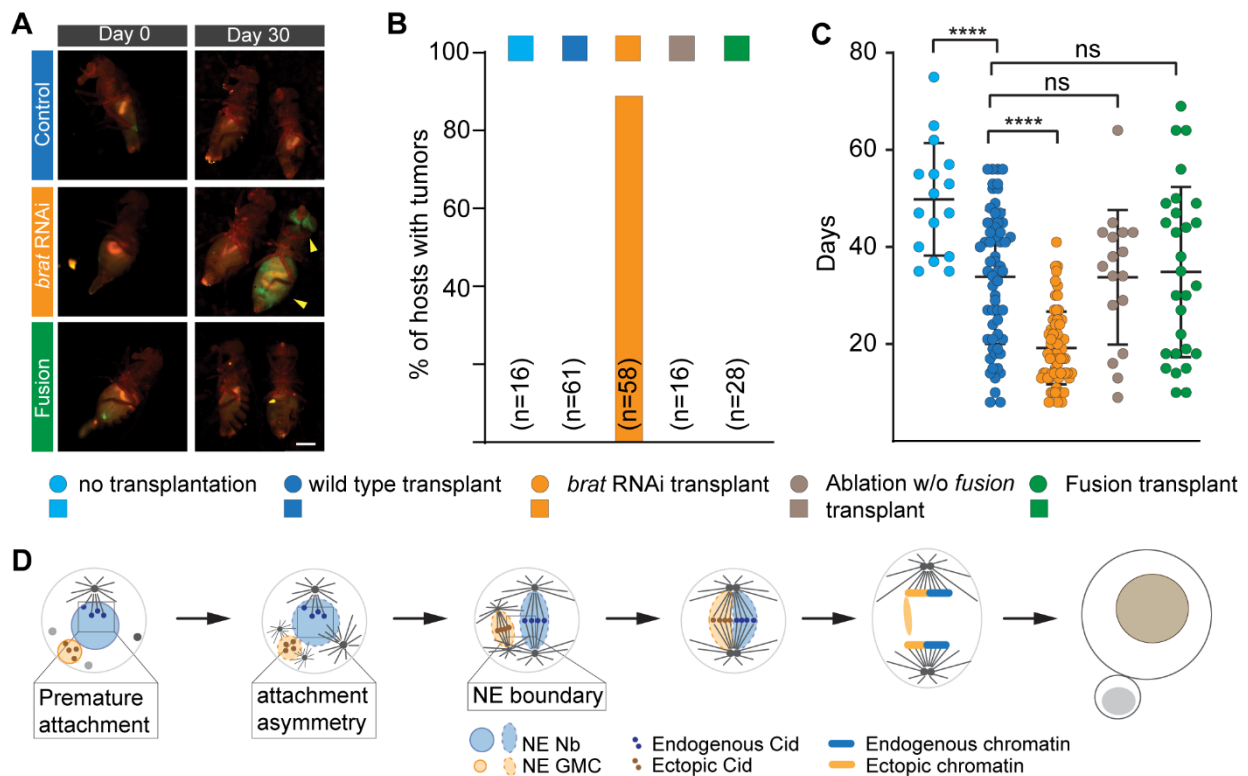

522

523

524 **Figure 6: Nb – GMC derived hybrid cells neither form visible tumors nor reduce the**

525 **lifespan in adult hosts.**

526 **(A)** Third instar larval brains expressing His2A::GFP (top row; negative control), co-expressing

527 *brat* RNAi (middle row; positive control) or containing Nb – GMC hybrid cells (bottom row) were

528 transplanted into wild type hosts and imaged at the day of transplantation (day 0) and Day 30.

529 Yellow arrowheads highlight tumors in wild type hosts transplanted with *brat* RNAi expressing

530 brains. **(B)** Bar graph showing the percentage of host flies containing visible tumors for the

531 indicated grafted samples (colored boxes on top of the graph). **(C)** Scatter plot showing the

532 lifespan of host flies after brain grafts. Grafted tissue either contained no fusions (wild type

533 transplants), expressing *brat* RNAi without fusions (*brat* RNAi transplants), attempted but

534 unsuccessful fusion (ablation without fusion transplants) and with brains containing hybrid cells

535 (fusion transplants). Host flies without transplanted tissue were plotted for comparison (no

536 transplantation). **(D)** Model: Asymmetric MTOCs capture neuroblast chromatin during interphase,

537 thereby establishing a physical separation between endogenous and ectopic chromatin. Nuclear

538 envelopes form an additional physical barrier. As hybrid cells enter mitosis, the neuroblast

539 centrosomes and introduced ectopic GMC centrosomes nucleate two separate bipolar spindles,

540 aligning their respective chromatin at the metaphase plate. This separation persists through

541 anaphase. Ectopic chromosomes fail to segregate accurately. Error bars correspond to SDs. One

542 way ANOVA. Ns; no significance, \*\*\*\*p<0.0001. Scale bar is 1mm.

543 **References**

544  
545

- 546 Aichel O. 1911. Über Zellverschmelzung mit quantitativ abnormer Chromosomenverteilung als Ursache  
547 der Geschwulstbildung. Verlag von Wilhelm Engelmann.
- 548 Akera T, Chmátal L, Trimm E, Yang K, Aonbangkhen C, Chenoweth DM, Janke C, Schultz RM, Lampson  
549 MA. 2017. Spindle asymmetry drives non-Mendelian chromosome segregation. *Science* **358**:668–672.  
550 doi:10.1126/science.aan0092
- 551 Akera T, Trimm E, Lampson MA. 2019. Molecular Strategies of Meiotic Cheating by Selfish Centromeres.  
552 *Cell* **178**:1132–1144.e10. doi:10.1016/j.cell.2019.07.001
- 553 Arco AG del, Edgar BA, Erhardt S. 2018. In Vivo Analysis of Centromeric Proteins Reveals a Stem Cell-  
554 Specific Asymmetry and an Essential Role in Differentiated, Non-proliferating Cells. *Cell Reports*  
555 **22**:1982–1993. doi:10.1016/j.celrep.2018.01.079
- 556 Ben-David U, Amon A. 2020. Context is everything: aneuploidy in cancer. *Nat Rev Genet* **21**:44–62.  
557 doi:10.1038/s41576-019-0171-x
- 558 Blachon S, Gopalakrishnan J, Omori Y, Polyanovsky A, Church A, Nicastrò D, Malicki J, Avidor-Reiss T.  
559 2008. Drosophila asterless and vertebrate Cep152 Are orthologs essential for centriole duplication.  
560 *Genetics* **180**:2081–2094. doi:10.1534/genetics.108.095141
- 561 Buszczak M, Paterno S, Lighthouse D, Bachman J, Planck J, Owen S, Skora AD, Nystul TG, Ohlstein B,  
562 Allen A, Wilhelm JE, Murphy TD, Levis RW, Matunis E, Srivali N, Hoskins RA, Spradling AC. 2007.  
563 The carnegie protein trap library: a versatile tool for Drosophila developmental studies. *Genetics*  
564 **175**:1505–1531. doi:10.1534/genetics.106.065961
- 565 Cabernard C, Doe CQ. 2009. Apical/basal spindle orientation is required for neuroblast homeostasis and  
566 neuronal differentiation in Drosophila. *Dev Cell* **17**:134–141. doi:10.1016/j.devcel.2009.06.009
- 567 Cabernard C, Prehoda KE, Doe CQ. 2010. A spindle-independent cleavage furrow positioning pathway.  
568 *Nature* **467**:91–94. doi:10.1038/nature09334
- 569 Caussinus E, Gonzalez C. 2005. Induction of tumor growth by altered stem-cell asymmetric division in  
570 Drosophila melanogaster. *Nat Genet* **37**:1125–1129. doi:10.1038/ng1632
- 571 Dietzl G, Chen D, Schnorrer F, Su K-C, Barinova Y, Fellner M, Gasser B, Kinsey K, Oettel S, Scheiblauer  
572 S, Couto A, Marra V, Keleman K, Dickson BJ. 2007. A genome-wide transgenic RNAi library for  
573 conditional gene inactivation in Drosophila. *Nature* **448**:151–156. doi:10.1038/nature05954
- 574 Dorn JF, Jaqaman K, Rines DR, Jelson GS, Sorger PK, Danuser G. 2005. Yeast Kinetochore Microtubule  
575 Dynamics Analyzed by High-Resolution Three-Dimensional Microscopy. *Biophys J* **89**:2835–2854.  
576 doi:10.1529/biophysj.104.058461
- 577 Drpic D, Almeida AC, Renda F, Damas J, Lewin HA, Larkin DM, Khodjakov A, Maiato H. 2018.  
578 Chromosome Segregation Is Biased by Kinetochore Size. *Curr Biol* **28**:1344–1356.e5.  
579 doi:10.1016/j.cub.2018.03.023
- 580 Fujiwara T, Bandi M, Nitta M, Ivanova EV, Bronson RT, Pellman D. 2005. Cytokinesis failure generating  
581 tetraploids promotes tumorigenesis in p53-null cells. *Nature* **437**:1043–1047. doi:10.1038/nature04217
- 582 Fukagawa T, Earnshaw WC. 2014. The Centromere: Chromatin Foundation for the Kinetochore  
583 Machinery. *Dev Cell* **30**:496–508. doi:10.1016/j.devcel.2014.08.016
- 584 Gallaud E, Nair AR, Horsley N, Monnard A, Singh P, Pham TT, Garcia DS, Ferrand A, Cabernard C.  
585 2020. Dynamic centriolar localization of Polo and Centrobin in early mitosis primes centrosome  
586 asymmetry. *Plos Biol* **18**:e3000762. doi:10.1371/journal.pbio.3000762
- 587 Gallaud E, Pham T, Cabernard C. 2017. Drosophila melanogaster Neuroblasts: A Model for Asymmetric  
588 Stem Cell Divisions. *Results Problems Cell Differ* **61**:183–210. doi:10.1007/978-3-319-53150-2\_8
- 589 Gambarotto D, Pannetier C, Ryniawec JM, Buster DW, Gogendeau D, Goupil A, Nano M, Simon A, Blanc  
590 D, Racine V, Kimata Y, Rogers GC, Basto R. 2019. Plk4 Regulates Centriole Asymmetry and Spindle  
591 Orientation in Neural Stem Cells. *Dev Cell* **50**:11–24.e10. doi:10.1016/j.devcel.2019.04.036

- 592 Gratz SJ, Cummings AM, Nguyen JN, Hamm DC, Donohue LK, Harrison MM, Wildonger J, O'Connor-  
593 Giles KM. 2013. Genome Engineering of Drosophila with the CRISPR RNA-Guided Cas9 Nuclease.  
594 *Genetics* **194**:1029–1035. doi:10.1534/genetics.113.152710
- 595 Heasley LR, Markus SM, DeLuca JG. 2017. “Wait Anaphase” Signals Are Not Confined to the Mitotic  
596 Spindle. *Mol Biol Cell* **28**:1186–1194. doi:10.1091/mbc.e17-01-0036
- 597 Henikoff S, Ahmad K, Platero JS, Steensel B van. 2000. Heterochromatic deposition of centromeric  
598 histone H3-like proteins. *Proc National Acad Sci* **97**:716–721. doi:10.1073/pnas.97.2.716
- 599 Januschke J, Gonzalez C. 2010. The interphase microtubule aster is a determinant of asymmetric division  
600 orientation in Drosophila neuroblasts. *J Cell Biology* **188**:693–706. doi:10.1083/jcb.200905024
- 601 Januschke J, Llamazares S, Reina J, Gonzalez C. 2011. Drosophila neuroblasts retain the daughter  
602 centrosome. *Nat Commun* **2**:243. doi:10.1038/ncomms1245
- 603 Januschke J, Reina J, Llamazares S, Bertran T, Rossi F, Roig J, Gonzalez C. 2013. Centriole controls  
604 mother–daughter centriole asymmetry in Drosophila neuroblasts. *Nat Cell Biol* **15**:241–248.  
605 doi:10.1038/ncb2671
- 606 Katsani KR, Karess RE, Dostatni N, Doye V. 2008. In Vivo Dynamics of Drosophila Nuclear Envelope  
607 Components. *Mol Biol Cell* **19**:3652–3666. doi:10.1091/mbc.e07-11-1162
- 608 Kawamura N. 2001. Fertilization and the first cleavage mitosis in insects. *Dev Growth Differ* **43**:343–349.  
609 doi:10.1046/j.1440-169x.2001.00584.x
- 610 Kracklauer MP, Banks SML, Xie X, Wu Y, Fischer JA. 2007. Drosophila klaroid Encodes a SUN Domain  
611 Protein Required for Klarsicht Localization to the Nuclear Envelope and Nuclear Migration in the Eye.  
612 *Fly* **1**:75–85. doi:10.4161/fly.4254
- 613 Lee YL, Burke B. 2018. LINC complexes and nuclear positioning. *Semin Cell Dev Biol* **82**:67–76.  
614 doi:10.1016/j.semcdb.2017.11.008
- 615 Loyer N, Januschke J. 2020. Where does asymmetry come from? Illustrating principles of polarity and  
616 asymmetry establishment in Drosophila neuroblasts. *Curr Opin Cell Biol* **62**:70–77.  
617 doi:10.1016/j.ceb.2019.07.018
- 618 Maiato H, Gomes AM, Sousa F, Barisic M. 2017. Mechanisms of Chromosome Congression during  
619 Mitosis. *Biology* **6**:13. doi:10.3390/biology6010013
- 620 McIntosh JR. 2016. Mitosis. *Csh Perspect Biol* **8**:a023218. doi:10.1101/cshperspect.a023218
- 621 Molina O, Abad MA, Solé F, Menéndez P. 2020. Aneuploidy in Cancer: Lessons from Acute  
622 Lymphoblastic Leukemia. *Trends Cancer*. doi:10.1016/j.trecan.2020.08.008
- 623 Muller H, Gil J, Drinnenberg IA. 2019. The Impact of Centromeres on Spatial Genome Architecture.  
624 *Trends Genet* **35**:565–578. doi:10.1016/j.tig.2019.05.003
- 625 Musacchio A. 2015. The Molecular Biology of Spindle Assembly Checkpoint Signaling Dynamics. *Curr*  
626 *Biol* **25**:R1002–1008. doi:10.1016/j.cub.2015.08.051
- 627 Ogle BM, Cascalho M, Platt JL. 2005. Biological implications of cell fusion. *Nat Rev Mol Cell Bio* **6**:567  
628 575. doi:10.1038/nrm1678
- 629 Platt JL, Cascalho M. 2019. Cell Fusion in Malignancy: A Cause or Consequence? A Provocateur or  
630 Cure? *Cells* **8**:587. doi:10.3390/cells8060587
- 631 Prosser SL, Pelletier L. 2017. Mitotic spindle assembly in animal cells: a fine balancing act. *Nat Rev Mol*  
632 *Cell Bio* **18**:187–201. doi:10.1038/nrm.2016.162
- 633 Quintyne NJ, Reing JE, Hoffelder DR, Gollin SM, Saunders WS. 2005. Spindle Multipolarity Is Prevented  
634 by Centrosomal Clustering. *Science* **307**:127–129. doi:10.1126/science.1104905
- 635 Ranjan R, Snedeker J, Chen X. 2019. Asymmetric Centromeres Differentially Coordinate with Mitotic  
636 Machinery to Ensure Biased Sister Chromatid Segregation in Germline Stem Cells. *Cell Stem Cell*.  
637 doi:10.1016/j.stem.2019.08.014

- 638 Razafsky D, Hodzic D. 2009. Bringing KASH under the SUN: the many faces of nucleo-cytoskeletal  
639 connections. *J Cell Biology* **186**:461–472. doi:10.1083/jcb.200906068
- 640 Rebollo E, Sampaio P, Januschke J, Llamazares S, Varmark H, Gonzalez C. 2007. Functionally unequal  
641 centrosomes drive spindle orientation in asymmetrically dividing *Drosophila* neural stem cells. *Dev*  
642 *Cell* **12**:467–474. doi:10.1016/j.devcel.2007.01.021
- 643 Reichmann J, Nijmeijer B, Hossain MJ, Eguren M, Schneider I, Politi AZ, Roberti MJ, Hufnagel L, Hiiragi  
644 T, Ellenberg J. 2018. Dual-spindle formation in zygotes keeps parental genomes apart in early  
645 mammalian embryos. *Science* **361**:189–193. doi:10.1126/science.aar7462
- 646 Rieder CL, Khodjakov A, Paliulis LV, Fortier TM, Cole RW, Sluder G. 1997. Mitosis in vertebrate somatic  
647 cells with two spindles: Implications for the metaphase/anaphase transition checkpoint and cleavage.  
648 *Proc National Acad Sci* **94**:5107–5112. doi:10.1073/pnas.94.10.5107
- 649 Rossi F, Gonzalez C. 2015. Studying tumor growth in *Drosophila* using the tissue allograft method. *Nat*  
650 *Protoc* **10**:1525–1534. doi:10.1038/nprot.2015.096
- 651 Roubinet C, Tsankova A, Pham TT, Monnard A, Caussin E, Affolter M, Cabernard C. 2017. Spatio-  
652 temporally separated cortical flows and spindle geometry establish physical asymmetry in fly neural  
653 stem cells. *Nat Commun* **8**:1383. doi:10.1038/s41467-017-01391-w
- 654 Rusan NM, Peifer M. 2007. A role for a novel centrosome cycle in asymmetric cell division. *J Cell Biology*  
655 **177**:13–20. doi:10.1083/jcb.200612140
- 656 Snook RR, Hosken DJ, Karr TL. 2011. The biology and evolution of polyspermy: insights from cellular and  
657 functional studies of sperm and centrosomal behavior in the fertilized egg. *Reproduction* **142**:779–792.  
658 doi:10.1530/rep-11-0255
- 659 Sunchu B, Cabernard C. 2020. Principles and mechanisms of asymmetric cell division. *Development*  
660 **147**:dev167650. doi:10.1242/dev.167650
- 661 Thomas GE, Renjith MR, Manna TK. 2017. Kinetochore–microtubule interactions in chromosome  
662 segregation: lessons from yeast and mammalian cells. *Biochem J* **474**:3559–3577.  
663 doi:10.1042/bcj20170518
- 664 Weierich C, Brero A, Stein S, Hase J von, Cremer C, Cremer T, Solovei I. 2003. Three-dimensional  
665 arrangements of centromeres and telomeres in nuclei of human and murine lymphocytes.  
666 *Chromosome Res* **11**:485–502. doi:10.1023/a:1025016828544
- 667 Yadlapalli S, Yamashita YM. 2013. Chromosome-specific nonrandom sister chromatid segregation during  
668 stem-cell division. *Nature* **498**:251–254. doi:10.1038/nature12106
- 669 Yu K, Zhong N, Xiao Y, She Z. 2019. Mechanisms of kinesin-7 CENP-E in kinetochore–microtubule  
670 capture and chromosome alignment during cell division. *Biol Cell* **111**:143–160.  
671 doi:10.1111/boc.201800082

672

673

674 **Methods**

675

676 **Fly Strains:**

677 Transgenes and fluorescent markers: *worGal4, UAS-mCherry::Jupiter* (Cabernard and Doe,  
678 2009); *worGal4, UAS-mCherry::Jupiter, Sqh::GFP* (Cabernard et al., 2010); *His2A::GFP*  
679 (Bloomington stock center); *UAS-mCherry::CAAX, UAS-iLID::CAAX::mCherry* (A. Monnard & C.  
680 Cabernard; unpublished); *Cid::EGFP* (Ranjan et al., 2019); *pUbp-Asl::GFP* (Blachon et al., 2008);  
681 *worgal4, UAS-mCherry::Jupiter, Asl::GFP* (this work); *pros::EGFP* (endogenously tagged with  
682 CRISPR; this work); *koi::GFP (CB04483)* (Buszczak et al., 2007); *cnb<sup>GD11735</sup>* RNAi line (v28651)  
683 (Dietzl et al., 2007).

684

685

686 **Generation of *pros::EGFP* with CRISPR:**

687 Target specific sequences with high efficiency were chosen using the CRISPR Optimal Target  
688 Finder (<http://tools.flycrispr.molbio.wisc.edu/targetFinder/>), the DRSC CRISPR finder  
689 (<http://www.flyrnai.org/crispr/>), and the Efficiency Predictor ([http://](http://www.flyrnai.org/evaluateCrispr/)  
690 [www.flyrnai.org/evaluateCrispr/](http://www.flyrnai.org/evaluateCrispr/)) web tools. Sense and antisense primers for these chosen sites  
691 were then cloned into pU6-BbsI-ChiRNA (Gratz et al., 2013) between BbsI sites. To generate the  
692 replacement donor template, EGFP and 1 kb homology arms flanking the insertion site were  
693 cloned into pHD-DsRed-attP (Addgene plasmid #51019) using Infusion technology  
694 (Takara/Clontech). Injections were performed in house. Successful events were detected by  
695 DsRed-positive screening in the F1 generation. Constitutively active Cre (BDSC#851) was then  
696 crossed in to remove the DsRed marker. Positive events were then balanced, genotyped, and  
697 sequenced.

698

699 **Live cell imaging acute cell-cell fusion:**

700 Imaging medium consists of Schneider's insect medium (Sigma-Aldrich S0146) mixed with 10%  
701 BGS (HyClone). Third instar larvae were dissected in imaging medium and the brains were  
702 transferred into a  $\mu$ -slide Angiogenesis or  $\mu$ -slide 8 well (Ibidi). Live samples were imaged with an  
703 Intelligent Imaging Innovations (3i) spinning disc confocal system, consisting of a Yokogawa CSU-  
704 W1 spinning disc unit and two Prime 95B Scientific CMOS cameras. A 60x/1.4NA oil immersion  
705 objective mounted on a Nikon Eclipse Ti microscope was used for imaging. Live imaging voxels  
706 are 0.22 X 0.22 X 0.75-1  $\mu$ m (60x/1.4NA spinning disc).



707 Neuroblast-GMC fusions were induced using a 3i Ablate! ablation system, consisting of a 532nm  
708 pulsed laser. We used a pulse width of 7 ns, targeting the membrane interface between the  
709 neuroblast and the adjacent GMC.

710

#### 711 **Colcemid treatment:**

712 Dissected brains were incubated with Colcemid (Sigma) in live imaging medium at a final  
713 concentration of of 25  $\mu\text{g mL}^{-1}$ .

714

#### 715 **Transplantation experiments:**

716 Brain lobes containing the hybrid cells expressing *His2A::GFP* and *worGal4, UAS-*  
717 *mCherry::Jupiter* were transplanted into 3 to 4 day old, well fed adult *w<sup>1118</sup>* female host flies as  
718 described previously (Rossi and Gonzalez, 2015). Custom made needles were prepared from  
719 Narishige GD-1 glass capillaries using a Narishige, needle puller. Injection needles were shaped  
720 with forceps to have a smooth, 45° opening. Transplanted flies were transferred into fresh vials  
721 each day for the first three days, followed by biweekly flipping. The tumor growth was monitored  
722 and recorded with a Leica MZ FLIII fluorescence stereomicroscope.

723

#### 724 **Image processing and measurements:**

725 Live cell images were processed using imaris x64 8.3.1 and image J.

726 For angle and distance measurements, the coordinates for the two spindle poles were determined  
727 in Imaris. From these coordinates, angles and distances between spindles were derived based  
728 on the calculations outlined below.

729 *Angle between spindles:*  $\theta = \cos^{-1} \frac{\mathbf{n} \cdot \mathbf{e}}{|\mathbf{n}| |\mathbf{e}|}$

730 Dot product:  $\mathbf{n} \cdot \mathbf{e} = (X1 * X2) + (Y1 * Y2) + (Z1 * Z2)$

731 Magnitude of vectors:  $|\mathbf{n}| = \sqrt{X_1^2 + Y_1^2 + Z_1^2}$   $|\mathbf{e}| = \sqrt{X_2^2 + Y_2^2 + Z_2^2}$

732 Where  $\mathbf{n}$  corresponds to the spindle vector:  $\mathbf{n} (x_1, y_1, z_1) = (N1-N1', N2-N2', N3-N3')$  and  $\mathbf{e}$  to the  
733 ectopic spindle vector:  $\mathbf{e} (x_2, y_2, z_2) = (E1-E1', E2-E2', E3-E3')$

734 N1, N2, N3 and N1', N2' and N3' are coordinates of the two poles of the Nb spindle. Similarly,  
735 E1, E2, and E3 and E1', E2' and E3' are coordinates of the ectopic spindle poles.

736

737

738

739

740 *Distance between spindle vectors:*

741 The midpoints of the two spindle vectors are calculated from coordinates of the poles on either  
742 side of the respective spindle. This is followed by calculating the distance between these  
743 midpoints.

744 Midpoint of the Nb spindle vector  $= \left( \frac{N_1+N_1^1}{2}, \frac{N_2+N_2^1}{2}, \frac{N_3+N_3^1}{2} \right) = (M_1, M_2, M_3)$

745 Midpoint of the GMC spindle vector  $= \left( \frac{G_1+G_1^1}{2}, \frac{G_2+G_2^1}{2}, \frac{G_3+G_3^1}{2} \right) = (m_1, m_2, m_3)$

746 Distance between these two points  $= \sqrt{(M_1-m_1)^2 + (M_2-m_2)^2 + (M_3-m_3)^2}$

747

748 *Centrosome - Cid distance:*

749 The centrosome (CS) - Cid distance was calculated using Cid and CS coordinates.

750 CS – Cid distance:  $= \sqrt{(x_1-x_2)^2 + (y_1-y_2)^2 + (z_1-z_2)^2}$

751 Where  $x_1, y_1, z_1$  correspond to CS and  $x_2, y_2, z_2$  to Cid coordinates, respectively.

752 Plotted values correspond to averaged values of all CS – Cid punctae distances and the  
753 corresponding standard deviations.

754 0 and 6 mins corresponds to the appearance of the basal centrosome and 6 minutes thereafter.

755 '0' and '6' mins corresponds to the appearance of the ectopic centrosome and 6 minutes  
756 thereafter.

757

758 **Statistical analysis:**

759 Statistical analysis was performed using Graphpad prism 8. Statistical significance was  
760 determined using paired or unpaired t-test and one-way ANOVA. Significance was indicated as  
761 following: \*,  $p < 0.05$ , \*\*,  $p < 0.01$ , \*\*\*,  $p < 0.001$ , \*\*\*\*,  $p < 0.0001$ , ns; not significant. Exact p values and  
762 complete statistical information can be found in Extended data table 1.

763 Measurements were taken from distinct samples and from several independent experiments.

764

765 **Acknowledgements**

766 We thank Xin Chen for fly stocks, David Salvador Garcia for generating the Pros::EGFP  
767 transgenic line, Sue Biggins and members of the Cabernard laboratory for helpful discussions  
768 and comments. This work was supported by the National Institutes of Health (1R01GM126029-  
769 03) and a Research Scholar grant from the American Cancer Society (130285-RSG-16253-01-  
770 CSM). Stocks obtained from the Bloomington Drosophila Stock Center (NIH P40OD018537) and  
771 from the Vienna Drosophila Resource Center (VDRC).

772

773 **Author contributions**

774 This study was conceived by B.S., N.L., and C.C. C.R provided some conceptual ideas early on.

775 Technical feasibility and was demonstrated by C.R & C.C.

776 B.S and N.L performed all the experiments with significant help from C.S.

777 B.S, N.L., C.S., and C.C analyzed the data.

778 B.S and C.C. wrote the manuscript.

779

780 **Competing interest declaration**

781 The authors declare no competing financial interests.

782

783 **Data availability statement**

784 The authors declare that all data supporting the findings of this study are available within the

785 paper and its supplementary files. Source data are available upon request.

786



787 **Supplementary Table 1: Statistical information**

788 Complete statistical information for the data shown in the corresponding figures.

789

790 **Video legends**

791

792 **Video 1: Wild type neuroblast division; related to Figure 1b**

793 Wild type control (unfused) neuroblast expressing the microtubule binding protein Cherry::Jupiter  
794 (white) and the canonical Histone marker His2A::GFP (cyan). Time scale is h:mm:ss and the  
795 scale bar is 5  $\mu\text{m}$ .

796

797 **Video 2: Wild type hybrid cell; related to Figure 1b**

798 Wild type hybrid cell derived from a neuroblast – GMC fusion *in vivo*, expressing the canonical  
799 Histone marker His2A::GFP (white in single channel; cyan in merge) and the microtubule binding  
800 protein Cherry::Jupiter (white). The blue and orange arrows mark endogenous and ectopic  
801 chromatin, respectively. Time scale is h:mm:ss and the scale bar is 3  $\mu\text{m}$ .

802

803 **Video 3: Wild type hybrid cell; related to Figure 2b**

804 Wild type hybrid cell derived from a neuroblast – GMC fusion *in vivo*, expressing the canonical  
805 Histone marker His2A::GFP (white in single channel; cyan in merge) and the microtubule binding  
806 protein Cherry::Jupiter (white). The blue and orange arrows mark endogenous and ectopic  
807 chromatin, respectively. Time scale is h:mm:ss and the scale bar is 2  $\mu\text{m}$ .

808

809 **Video 4: Wild type neuroblast division; related to Extended Data Figure 2b**

810 Wild type control (unfused) neuroblast, expressing the microtubule binding protein Cherry::Jupiter  
811 (white) and the centromere-specific H3 variant Cid::EGFP (Cyan). Purple and yellow arrows point  
812 to the apical and basal centrosome, respectively. The blue arrow refers to moving Cid clusters.  
813 Time scale is h:mm:ss and the scale bar is 1  $\mu\text{m}$ .

814

815 **Video 5: Wild type neuroblast division; related to Extended Data Figure 2f**

816 Wild type control (unfused) neuroblast, expressing the membrane marker mCherry::CAAX  
817 (white), the canonical Histone marker His2A::GFP (white) and Cid::EGFP (Cyan). The green  
818 arrow points to Cid clusters. Time scale is h:mm:ss and the scale bar is 5  $\mu\text{m}$ .

819

820 **Video 6: Wild type neuroblast exposed to Colcemid; related to Extended Data Figure 2g**

821 Wild type control (unfused) neuroblast exposed to the microtubule depolymerizing drug Colcemid,  
822 expressing the membrane marker mCherry::CAAX (white), the microtubule binding protein  
823 Cherry::Jupiter (white) and Cid::EGFP (Cyan). The yellow arrow points to the apical centrosome,  
824 the blue arrow to Cid clusters. Time scale is h:mm:ss and the scale bar is 1  $\mu$ m.

825

826 **Video 7: Cnb RNAi expressing neuroblast; related to Extended Data Figure 2i**

827 *cnb* RNAi expressing (unfused) neuroblast, co-expressing the microtubule binding protein  
828 Cherry::Jupiter (white) and Cid::EGFP (Cyan). The orange and blue arrow points to the apical  
829 and basal centrosome, respectively. The green arrow highlights Cid clusters. Time scale is  
830 h:mm:ss and the scale bar is 1  $\mu$ m.

831

832 **Video 8: wild type hybrid cell; related to Extended Data Figure 3a**

833 Wild type hybrid cells expressing the microtubule binding protein Cherry::Jupiter (white) and  
834 Cid::EGFP (white in single channel; Cyan in merge). The blue and orange arrow highlights  
835 endogenous and ectopic Cid clusters, respectively. Time scale is h:mm:ss and the scale bar is 1  
836  $\mu$ m.

837 **Video 9: Cnb RNAi expressing hybrid cell; related to Extended Data Figure 3d**

838 *cnb* RNAi expressing hybrid cell, expressing the microtubule binding protein Cherry::Jupiter  
839 (white) and Cid::EGFP (white in single channel; Cyan in merge). The blue and orange arrow  
840 highlights endogenous and ectopic Cid clusters, respectively. The yellow arrow indicates mixing  
841 of endogenous and ectopic Cid clusters. Time scale is h:mm:ss and the scale bar is 1  $\mu$ m.

842

843 **Video 10: wild type hybrid cell; related to Figure 4e**

844 Wild type hybrid cell, expressing the canonical Histone marker His2A::GFP (white). The blue and  
845 orange arrow highlights endogenous and ectopic chromosomes, respectively. The magenta  
846 arrowhead highlights the fate of missegregated chromosomes. This hybrid cell forms a  
847 heterokaryon. Time scale is h:mm:ss and the scale bar is 1  $\mu$ m.

848

849

850

851

852
